# Supplementary material for: Interactions between Mediterranean Diet Supplemented with Dairy Foods and the Gut Microbiota Influence Cardiovascular Health in an Australian Population
Source: MDPI journal article supplement (doi:10.3390/nu15163645), 2023-08-19
Supplement: s1 [file s1]

**Interactions between Mediterranean Diet Supplemented with Dairy Foods and the Gut  
Microbiota Influence Cardiovascular Health in an Australian Population**

Jocelyn M. Choo<sup>1,2</sup>, Karen J. Murphy<sup>3,4</sup>, Alexandra T. Wade<sup>3,5</sup>, Yanan Wang<sup>6</sup>, Ella L. Bracci<sup>3,4</sup>, Courtney R. Davis<sup>3,4</sup>, Kathryn A. Dyer<sup>4</sup>, Richard J. Woodman<sup>7</sup>, Jonathan M. Hodgson<sup>8,9</sup>, Geraint B. Rogers<sup>1,2</sup>

<sup>\*\*</sup> Jocelyn M Choo and Karen J Murphy are joint first authors

## SUPPLEMENTARY TABLE AND FIGURES

**Supplementary Table S1. Taxa that are significantly altered by the 8-week MedDairy (MD) or low-fat control diet (LFD) intervention.**

| Bacteria                     | Within group comparison |       |                    |       | Between group comparison |       |
|------------------------------|-------------------------|-------|--------------------|-------|--------------------------|-------|
|                              | MedDairy (MD)           |       | Low-fat diet (LFD) |       | 8-weeks                  |       |
|                              | p                       | FDR   | p                  | FDR   | p                        | FDR   |
| Lachnospiraceae NK4A136      | 0.011*                  | 0.754 | 0.748              | 1     | 0.266                    | 1     |
| Streptococcus                | 0.017*                  | 0.754 | 0.216              | 0.858 | 0.078                    | 1     |
| Collinsella                  | 0.021*                  | 0.754 | 0.003*             | 0.461 | 0.014*                   | 0.977 |
| Butyricicoccus               | 0.022*                  | 0.754 | 0.620              | 1     | 0.050*                   | 0.982 |
| Oscillospirales (uncultured) | 0.014*                  | 0.754 | 1                  | 1     | 0.505                    | 1     |
| Oscillospirales UCG-002      | 0.031*                  | 0.897 | 0.405              | 0.858 | 0.659                    | 1     |
| Veillonella                  | 0.036*                  | 0.932 | 0.724              | 1     | 0.049*                   | 0.982 |
| Ruminococcaceae UBA1819      | 0.043*                  | 0.966 | 0.415              | 0.858 | 0.110                    | 0.982 |
| Oscillospirales UCG-010      | 0.461                   | 0.966 | 0.012*             | 0.720 | 0.572                    | 1     |
| Oscillospirales UCG-005      | 0.727                   | 1     | 0.036*             | 0.858 | 0.074                    | 0.982 |
| Moryella                     | 0.624                   | 1     | 0.014*             | 0.719 | 0.059                    | 0.982 |
| Izemoplasmatales             | 0.820                   | 1     | 0.026*             | 0.858 | 0.148                    | 0.982 |
| Holdemania                   | 0.913                   | 1     | 0.031*             | 0.858 | 0.746                    | 1     |
| Rikenellaceae RC9 gut group  | 0.944                   | 1     | 0.033*             | 0.858 | 0.155                    | 0.982 |

Statistical analyses were performed using the Wilcoxon sign-rank test for within group comparison and the Mann-Whitney test for between group comparison. \* denotes  $p \leq 0.05$ .

**Supplementary Table S2. Correlation analysis between *Butyricicoccus* and clinical, anthropometric and cognitive measurements for both MedDairy (MD) and low-fat diet (LFD) groups combined (whole dataset), and stratified by MD or LFD diet.**

| Variable 1      | Variable 2            | MD and LFD groups combined |         |        |
|-----------------|-----------------------|----------------------------|---------|--------|
|                 |                       | r                          | p       | FDR    |
| 10-point MDS    | <i>Butyricicoccus</i> | 0.283                      | 0.003*  | 0.048* |
| 18-point MDS    | <i>Butyricicoccus</i> | 0.331                      | <0.001* | 0.011* |
| SBP (clinic)    | <i>Butyricicoccus</i> | -0.241                     | 0.013*  | 0.114  |
| Glucose         | <i>Butyricicoccus</i> | 0.228                      | 0.019*  | 0.152  |
| 10-point MDS    | <i>Colinsella</i>     | -0.091                     | 0.353   | 0.747  |
| 18-point MDS    | <i>Colinsella</i>     | -0.301                     | 0.002*  | 0.028* |
| Cholesterol:HDL | <i>Colinsella</i>     | 0.215                      | 0.027*  | 0.195  |

  

| Variable 1      | Variable 2            | MD only |        |        | LFD only |        |       |
|-----------------|-----------------------|---------|--------|--------|----------|--------|-------|
|                 |                       | r       | p      | FDR    | r        | p      | FDR   |
| 10-point MDS    | <i>Butyricicoccus</i> | 0.464   | 0.006* | 0.094  | 0.199    | 0.246  | 0.694 |
| 18-point MDS    | <i>Butyricicoccus</i> | 0.509   | 0.002* | 0.050* | 0.196    | 0.252  | 0.704 |
| SBP (clinic)    | <i>Butyricicoccus</i> | -0.377  | 0.026* | 0.232  | -0.203   | 0.235  | 0.691 |
| Glucose         | <i>Butyricicoccus</i> | 0.396   | 0.019* | 0.192  | 0.070    | 0.683  | 0.967 |
| 10-point MDS    | <i>Colinsella</i>     | -0.165  | 0.350  | 0.771  | -0.065   | 0.705  | 0.967 |
| 18-point MDS    | <i>Colinsella</i>     | -0.329  | 0.058  | 0.354  | -0.098   | 0.570  | 0.914 |
| Cholesterol:HDL | <i>Colinsella</i>     | 0.183   | 0.293  | 0.539  | 0.341    | 0.042* | 0.328 |

r denotes correlation coefficient; FDR denotes false discovery rate adjustment multiple testing.

**A**

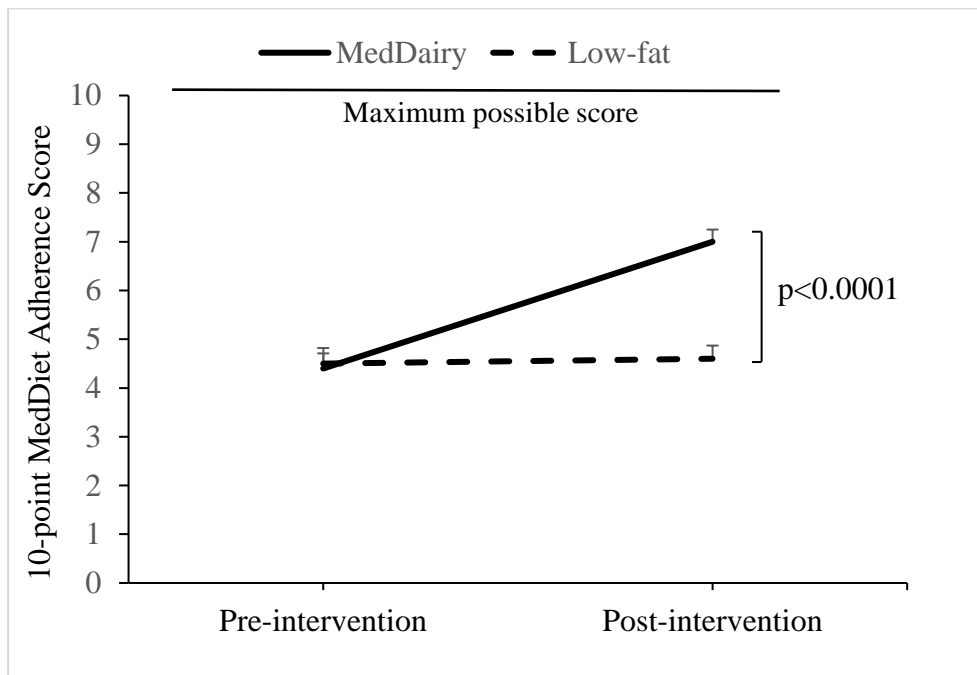

**B**

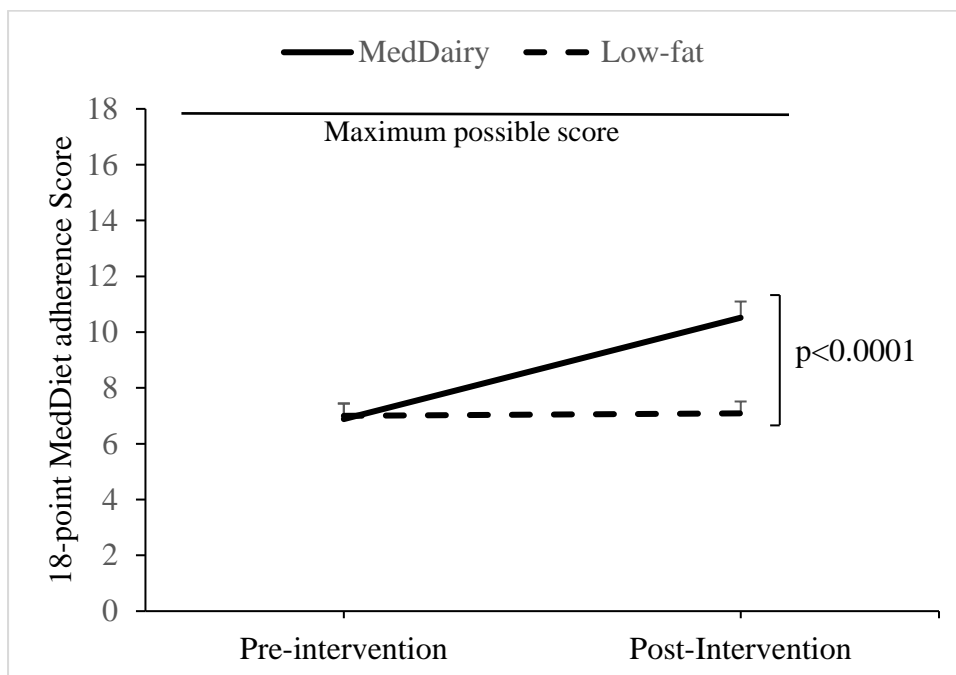

**Supplementary Figure S1.** (A) Mediterranean diet score before and during MedDairy and Low-Fat dietary phases. Maximum possible score = 10 based on Trichopoulou *et al.* (2003). (B) Mediterranean diet score before and during MedDairy and Low-Fat dietary phases. Maximum possible score = 18 based on Sofi *et al.* (2014). Data is shown as Mean  $\pm$  standard error of mean.  $p < 0.0001$  indicate significant difference between groups.

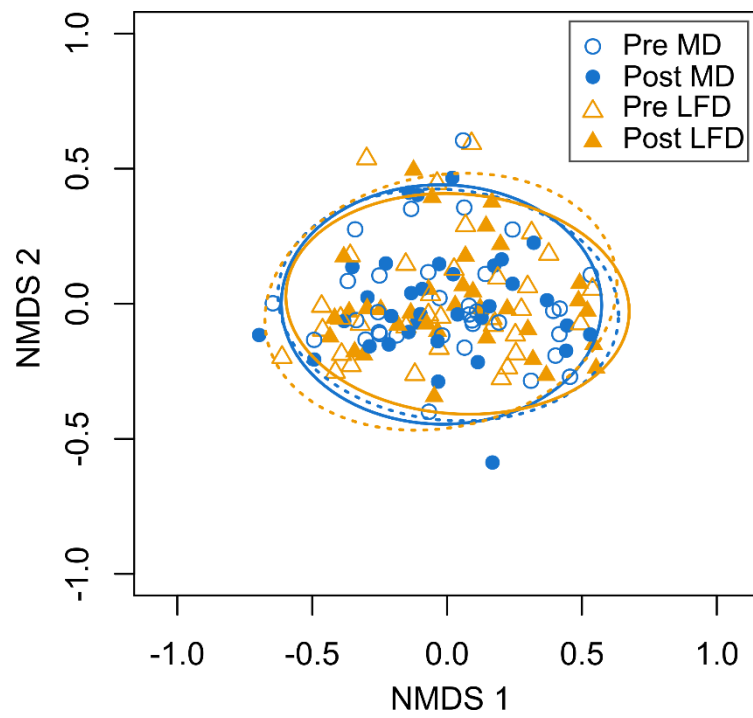

**Supplementary Figure S2.** Non-metric multidimensional scaling (NMDS) ordination plot based on the gut microbiota composition before and after 8-weeks of MedDairy (MD) or low-fat diet (LFD) intervention.

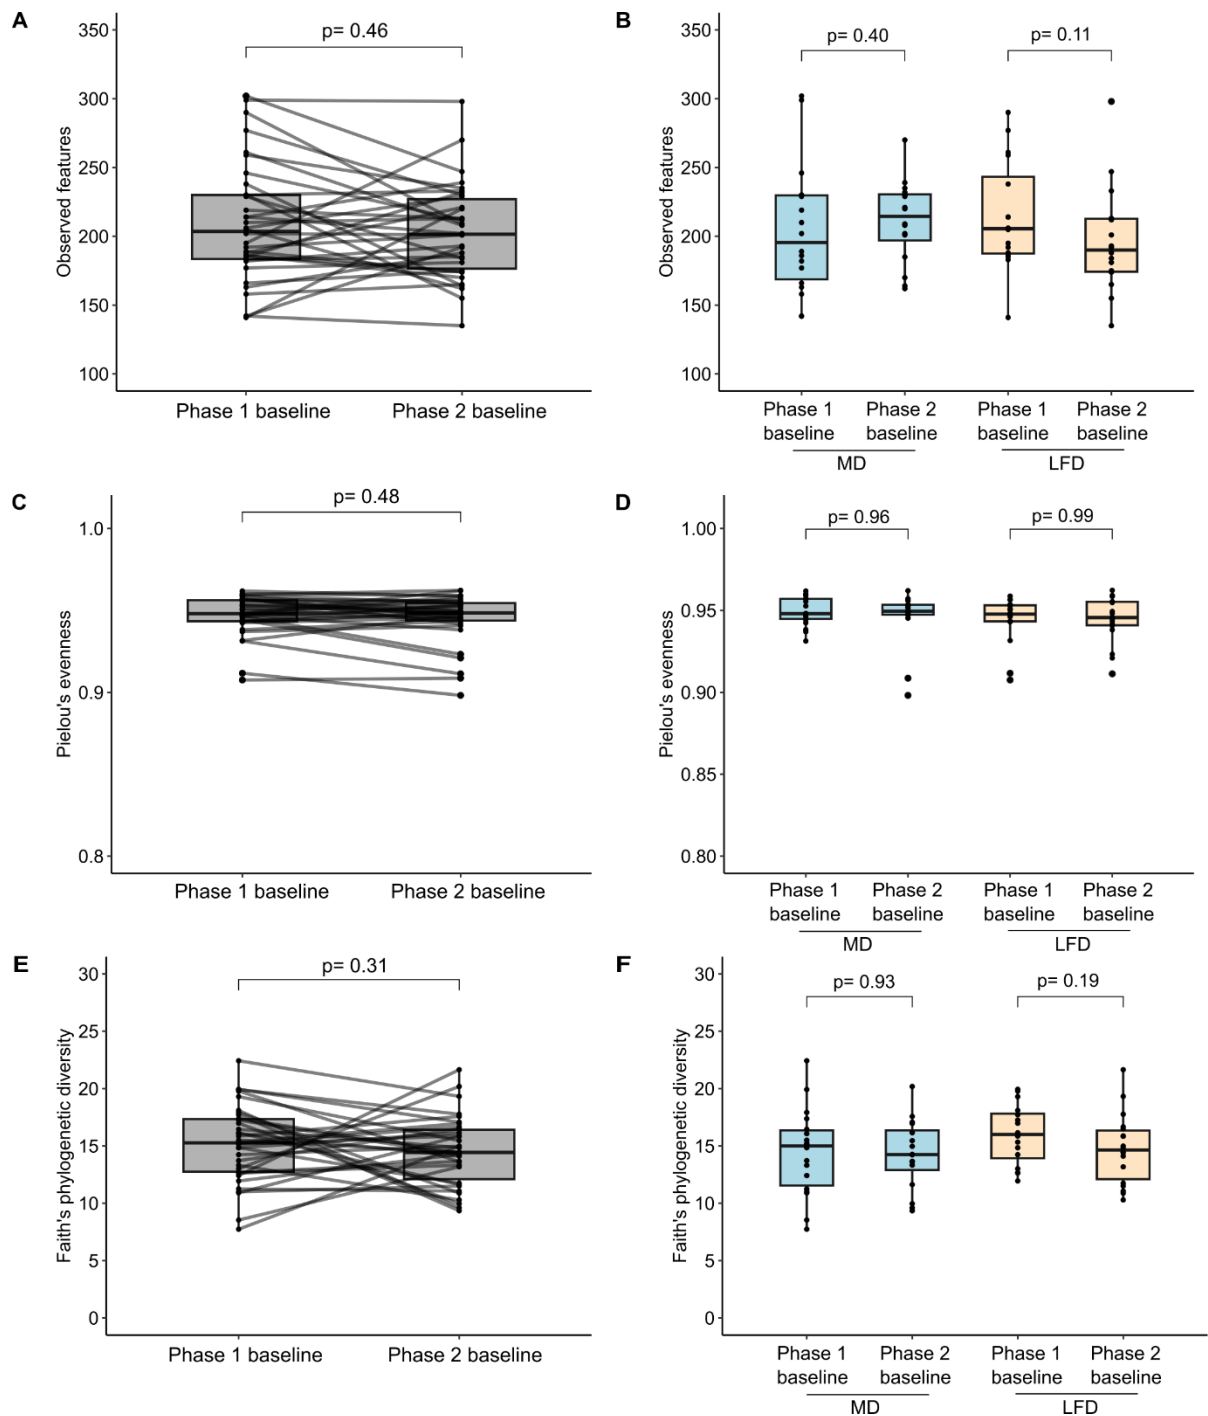

**Supplementary Figure S3.** Comparison of microbiota characteristics between the baseline of Phase 1 and Phase 2 for alpha diversity measures of (A, B) microbial richness, (C, D) evenness and (E, F) diversity. Statistical comparisons were performed using the Wilcoxon sign-rank test (within-group assessment) or Mann-Whitney test (between group assessment).

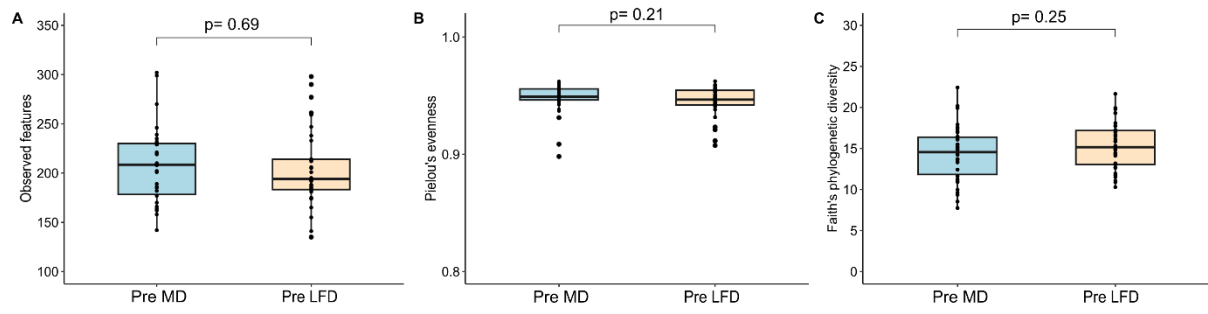

**Figure S4.** Comparison of microbiota characteristics between the MedDairy (MD) and Low-fat diet (LFD) groups at baseline for alpha diversity measures of (A) microbial richness, (B) evenness and (C) diversity. Statistical comparisons were performed using the Mann-Whitney test (between group assessment).

## REFERENCES

1. Trichopoulou A, Costacou T, Bamia C, et al. Adherence to a Mediterranean diet and survival in a Greek population. *The New England journal of medicine* 2003;348(26), 2599-608.
2. Sofi F, Macchi C, Abbate R, et al. Mediterranean diet and health status: an updated meta-analysis and a proposal for a literature-based adherence score. *Public Health Nutr* 2014;17(12), 2769-82.
